# Supplementary material for: Association Between Magnitude of Differential Blood Pressure Reduction and Secondary Stroke Prevention: A Meta-analysis and Meta-Regression
Source: PubMed Central journal article supplement (PMC10028545; doi:10.1001/jamaneurol.2023.0218), 2023-03-20
Supplement: jamaneurol-e230218-s001.pdf [file jamaneurol-e230218-s001.pdf]

## Supplemental Online Content

Hsu CY, Saver JL, Ovbiagele B, Wu YL, Cheng CY, Lee M. Association between magnitude of differential blood pressure reduction and secondary stroke prevention: a meta-analysis and meta-regression. *JAMA Neurol.* Published online March 20, 2023. doi:10.1001/jamaneurol.2023.0218

**eFigure 1.** Study selection

**eFigure 2.** Risk of bias

**eFigure 3.** Major cardiovascular events

**eFigure 4.** Recurrent ischemic stroke

**eFigure 5.** Hemorrhagic stroke

**eFigure 6.** Fatal or disabling stroke

**eFigure 7.** Myocardial infarction

**eFigure 8.** Death from cardiovascular causes

**eFigure 9.** Death from any cause

**eFigure 10.** Heart failure

**eFigure 11.** Sensitivity testing

**eFigure 12.** Time interval from index stroke to randomization

**eFigure 13.** Study duration

**eFigure 14.** Ethnicity

**eFigure 15.** Antihypertensive drugs used in more intensive treated group

**eFigure 16.** Mean baseline SBP

**eFigure 17.** Achieved SBP in more intensive treated group

**eFigure 18.** Achieved SBP in less intensive treated group

**eFigure 19.** Entry event

**eFigure 20.** Sample size

**eFigure 21.** Study design

**eFigure 22.** Definition of differential blood pressure reduction

**eFigure 23.** Publication bias

**eTable.** Grading of Recommendations, Assessment, Development and Evaluations (GRADE)

**eReferences**

This supplemental material has been provided by the authors to give readers additional information about their work.

**eTable. Grading of Recommendations, Assessment, Development and Evaluations (GRADE)**

Legends: Summary of the quality assessments and summary finding for the primary and secondary outcomes

| Quality assessment               |        |                        |                    |                         |                        |                  | Summary of findings   |                |                   |                           | Quality  |
|----------------------------------|--------|------------------------|--------------------|-------------------------|------------------------|------------------|-----------------------|----------------|-------------------|---------------------------|----------|
|                                  |        |                        |                    |                         |                        |                  | Event, No./Total, No. |                | Effect            |                           |          |
| Outcomes, No. of studies         | Design | Limitations            | Inconsistency      | Indirectness            | Imprecision            | Publication bias | More intensive        | Less intensive | Relative (95% CI) | Absolute                  |          |
| Recurrent stroke, n=10           | RCT    | No serious limitations | some inconsistency | No serious indirectness | No serious imprecision | Undetected       | 1704/20344            | 2061/20366     | 0.83 (0.78-0.88)  | 17 fewer per 1000 (12-22) | High     |
| Major cardiovascular events, n=9 | RCT    | No serious limitations | some inconsistency | No serious indirectness | No serious imprecision | Undetected       | 2348/19582            | 2679/19608     | 0.88 (0.83-0.92)  | 16 fewer per 1000 (11-23) | High     |
| Ischemic stroke, n=6             | RCT    | No serious limitations | some inconsistency | No serious indirectness | some imprecision       | Undetected       | 1217/16134            | 1403/16189     | 0.87 (0.81-0.94)  | 11 fewer per 1000 (5-17)  | Moderate |
| Hemorrhagic stroke, n=6          | RCT    | No serious limitations | some inconsistency | No serious indirectness | some imprecision       | Undetected       | 114/16134             | 212/16189      | 0.54 (0.43-       | 6 fewer per 1000 (4-7)    | Moderate |

|                                       |     |                        |                          |                         |                     |            |            |            |                  |                         |          |
|---------------------------------------|-----|------------------------|--------------------------|-------------------------|---------------------|------------|------------|------------|------------------|-------------------------|----------|
|                                       |     |                        |                          |                         |                     |            |            |            | 0.68)            |                         |          |
| Fatal or disabling stroke, n=6        | RCT | No serious limitations | some inconsistency       | No serious indirectness | some imprecision    | Undetected | 253/8537   | 334/8539   | 0.76 (0.64-0.89) | 9 fewer per 1000 (4-14) | Moderate |
| Myocardial infarction, n=9            | RCT | No serious limitations | Serious inconsistency    | No serious indirectness | Serious imprecision | Undetected | 365/20344  | 409/20366  | 0.89 (0.78-1.03) | Not significant         | Moderate |
| Death from cardiovascular causes, n=9 | RCT | No serious limitations | No serious inconsistency | No serious indirectness | some imprecision    | Undetected | 629/19711  | 728/19736  | 0.86 (0.78-0.96) | 5 fewer per 1000 (1-8)  | Moderate |
| Death from any cause, n=10            | RCT | No serious limitations | Some inconsistency       | No serious indirectness | some imprecision    | Undetected | 1511/20344 | 1554/20366 | 0.97 (0.91-1.04) | Not significant         | Moderate |
| Heart failure, n=2                    | RCT | No serious limitations | Serious inconsistency    | No serious indirectness | Serious imprecision | Undetected | 126/10779  | 120/10816  | 1.05 (0.82-1.35) | Not significant         | Low      |

RCT: randomized clinical trial



## eFigure 1. Study selection

Legends: Flow of study selection.

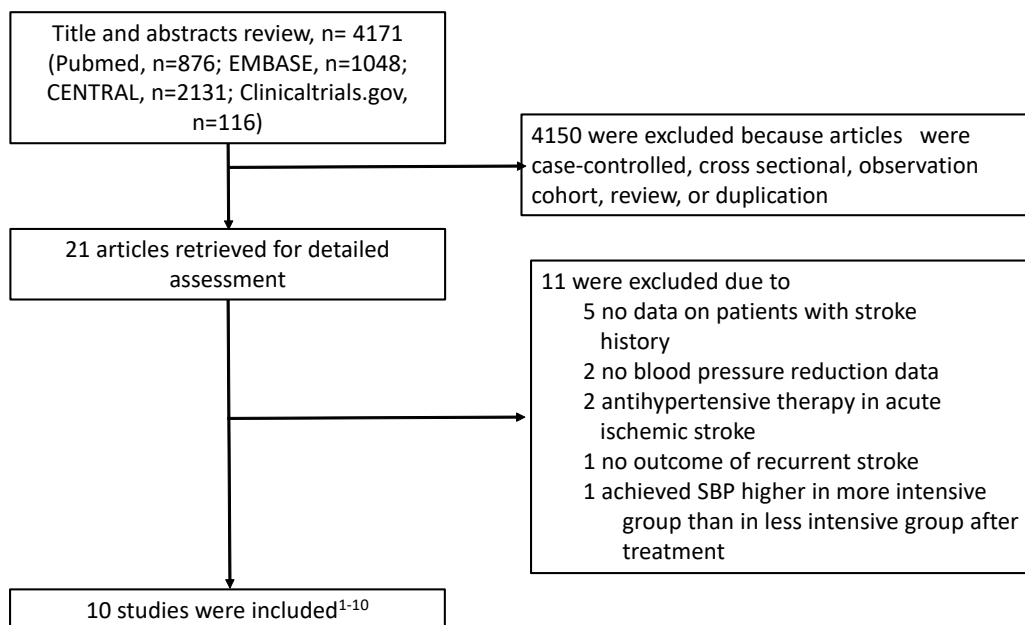

## eFigure 2. Risk of bias

Legends: Risk of bias for included trials.

|                         | Random sequence generation (selection bias) | Allocation concealment (selection bias) | Blinding of participants and personnel (performance bias) | Blinding of outcome assessment (detection bias) | Incomplete outcome data (attrition bias) | Selective reporting (reporting bias) | Other bias |
|-------------------------|---------------------------------------------|-----------------------------------------|-----------------------------------------------------------|-------------------------------------------------|------------------------------------------|--------------------------------------|------------|
| DUTCH TIA <sup>5</sup>  |                                             |                                         |                                                           |                                                 |                                          |                                      |            |
| Liu et al <sup>10</sup> |                                             |                                         |                                                           |                                                 |                                          |                                      |            |
| PAST-BP <sup>1</sup>    |                                             |                                         |                                                           |                                                 |                                          |                                      |            |
| PATS <sup>7</sup>       |                                             |                                         |                                                           |                                                 |                                          |                                      |            |
| PODCAST <sup>8</sup>    |                                             |                                         |                                                           |                                                 |                                          |                                      |            |
| PRoFESS <sup>3</sup>    |                                             |                                         |                                                           |                                                 |                                          |                                      |            |
| PROGRESS <sup>4</sup>   |                                             |                                         |                                                           |                                                 |                                          |                                      |            |
| RESPECT <sup>6</sup>    |                                             |                                         |                                                           |                                                 |                                          |                                      |            |
| SPS <sup>3</sup>        |                                             |                                         |                                                           |                                                 |                                          |                                      |            |
| TEST <sup>3</sup>       |                                             |                                         |                                                           |                                                 |                                          |                                      |            |

### eFigure 3: Major cardiovascular events

Legends: Relative risk with 95% confidence interval of major cardiovascular events in more intensive vs less intensive blood pressure lowering in patients with stroke or transient ischemic attack.

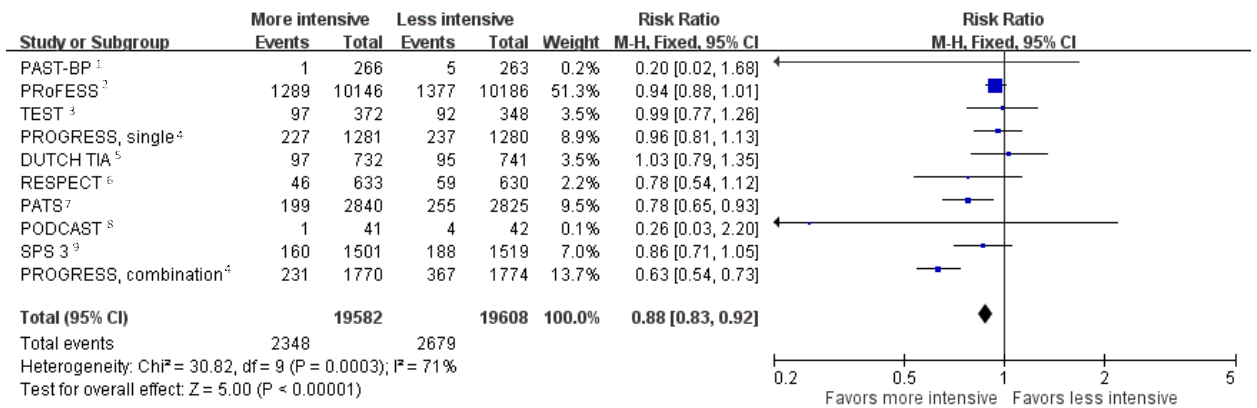

## eFigure 4. Recurrent ischemic stroke

Legends: Relative risk with 95% confidence interval of recurrent ischemic stroke in more intensive vs less intensive blood pressure lowering in patients with stroke or transient ischemic attack.

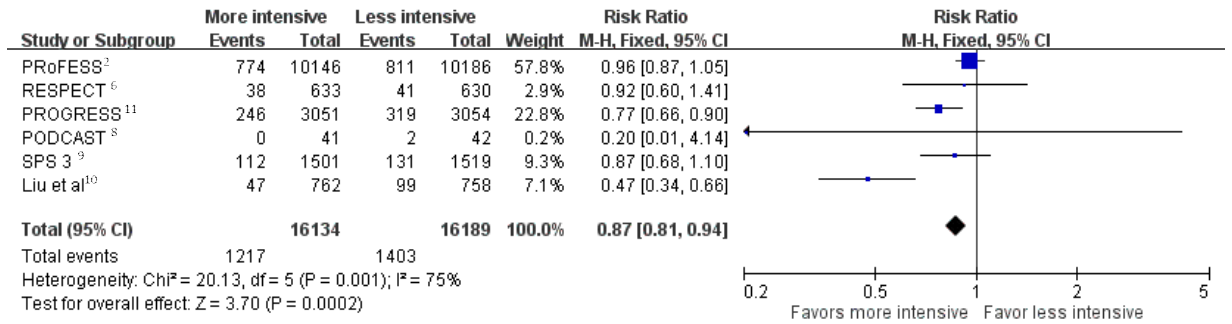



## eFigure 5. Hemorrhagic stroke

Legends: Relative risk with 95% confidence interval of hemorrhagic stroke in more intensive vs less intensive blood pressure lowering in patients with stroke or transient ischemic attack.

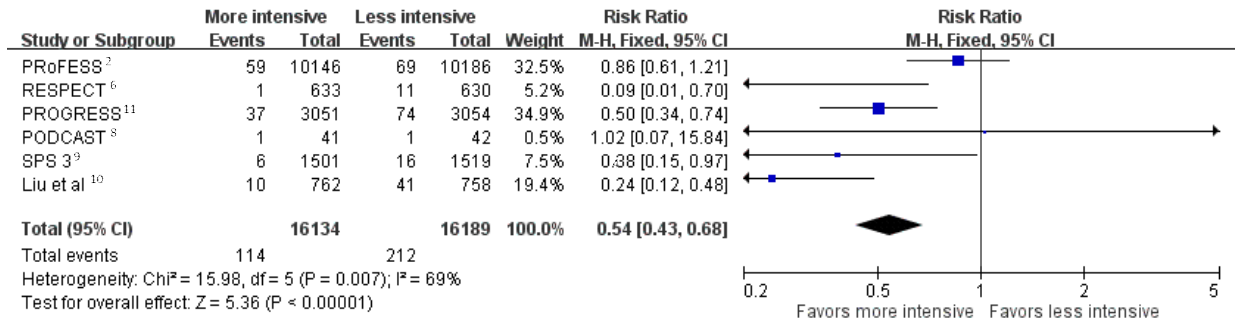

## eFigure 6. Fatal or disabling stroke

Legends: Relative risk with 95% confidence interval of fatal or disabling stroke in more intensive vs less intensive blood pressure lowering in patients with stroke or transient ischemic attack.

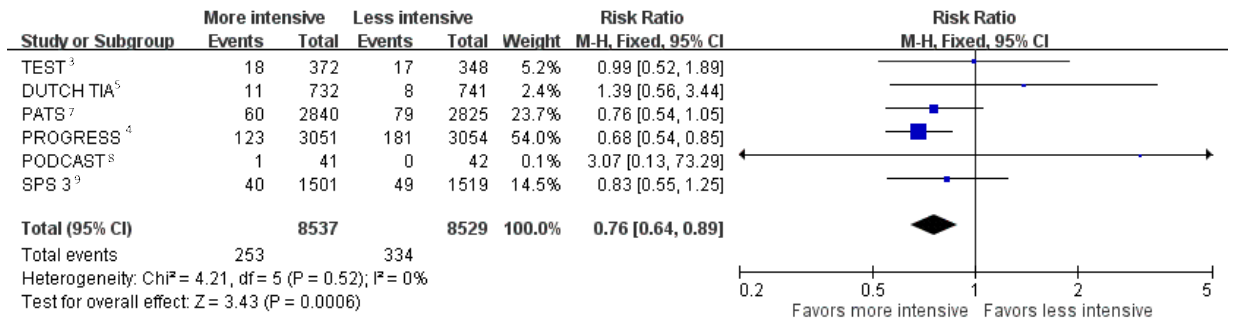

## eFigure 7. Myocardial infarction

Legends: Relative risk with 95% confidence interval of myocardial infarction in more intensive vs less intensive blood pressure lowering in patients with stroke or transient ischemic attack.

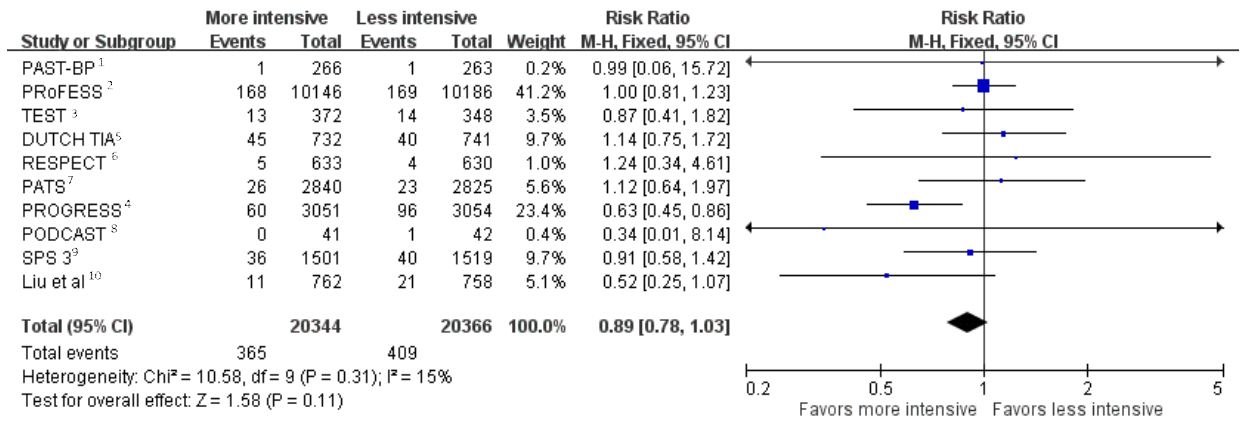

## eFigure 8. Death from cardiovascular causes

Legends: Relative risk with 95% confidence interval of death from cardiovascular causes in more intensive vs less intensive blood pressure lowering in patients with stroke or transient ischemic attack.

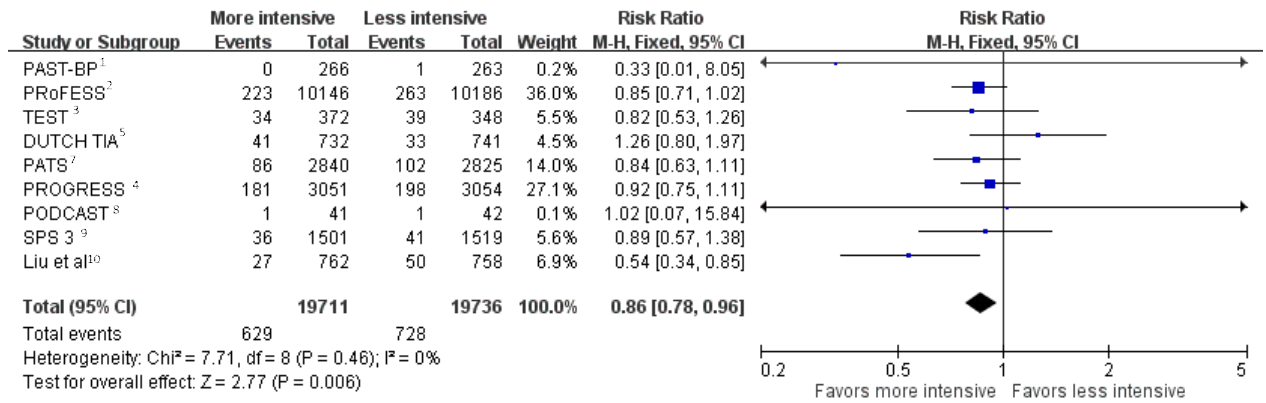

## eFigure 9. Death from any cause

Legends: Relative risk with 95% confidence interval of death from any cause in more intensive vs less intensive

blood pressure lowering in patients with stroke or transient ischemic attack.

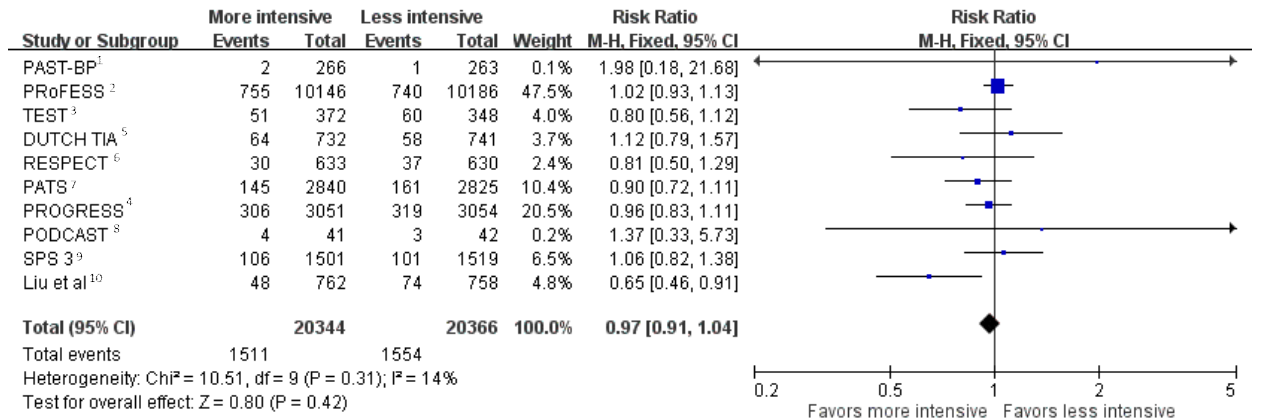

## eFigure 10. Heart failure

Legends: Relative risk with 95% confidence interval of heart failure in more intensive vs less intensive blood pressure lowering in patients with stroke or transient ischemic attack.

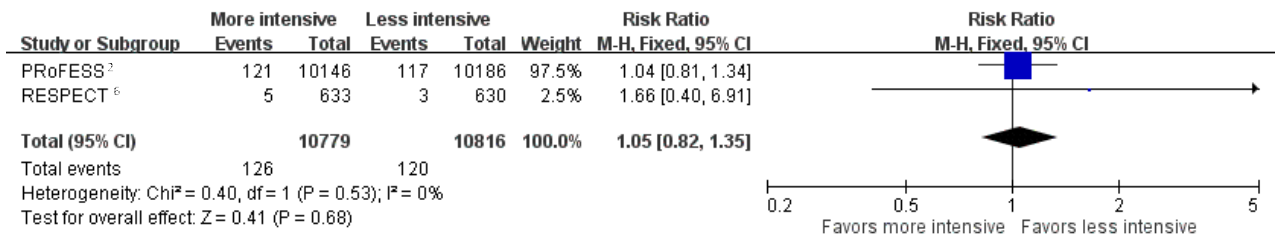

## eFigure 11. Sensitivity testing

Legends: Relative risk with 95% confidence interval of recurrent stroke in more intensive vs less intensive blood pressure lowering in patients with stroke or transient ischemic attack among trials with recurrent stroke being the primary outcome in the original trial design.

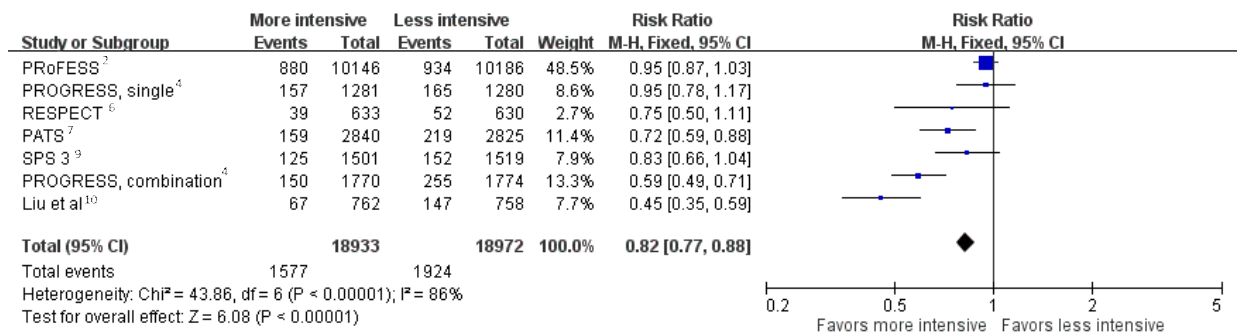

## eFigure 12. Time interval from index stroke to randomization

Legends: Relative risk with 95% confidence interval of recurrent stroke in more intensive vs less intensive blood pressure lowering in patients with stroke or transient ischemic attack with randomization within 6 months from stroke vs within 3-5 years from stroke.

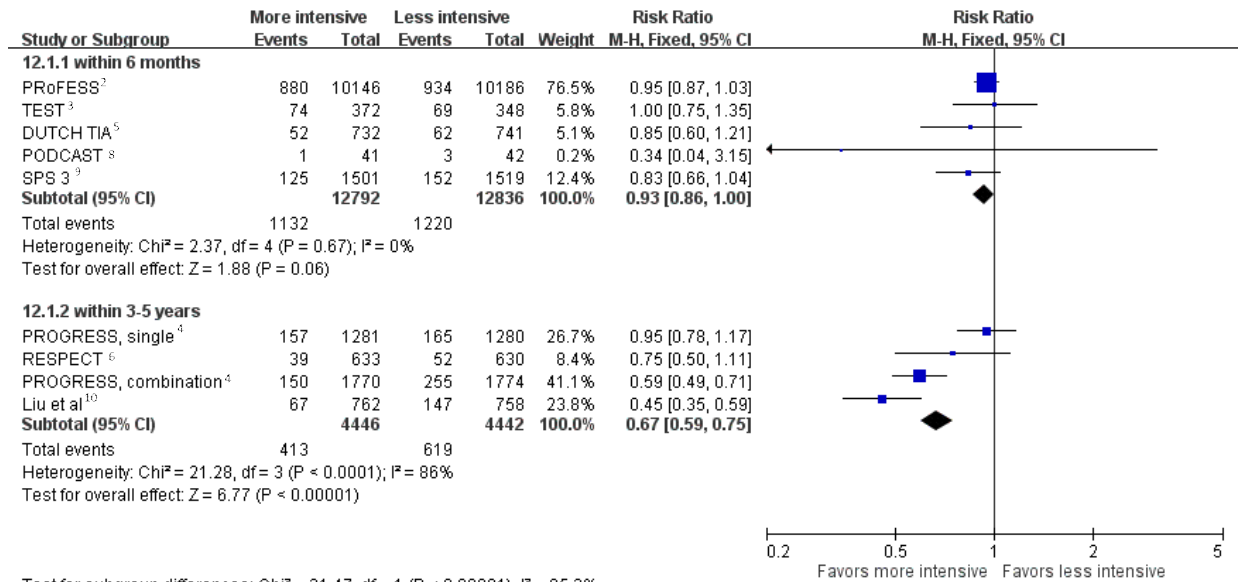



## eFigure 13. Study duration

Legends: Relative risk with 95% confidence interval of recurrent stroke in more intensive vs less intensive blood pressure lowering in patients with stroke or transient ischemic attack with study duration < 3 years vs ≥ 3 years.

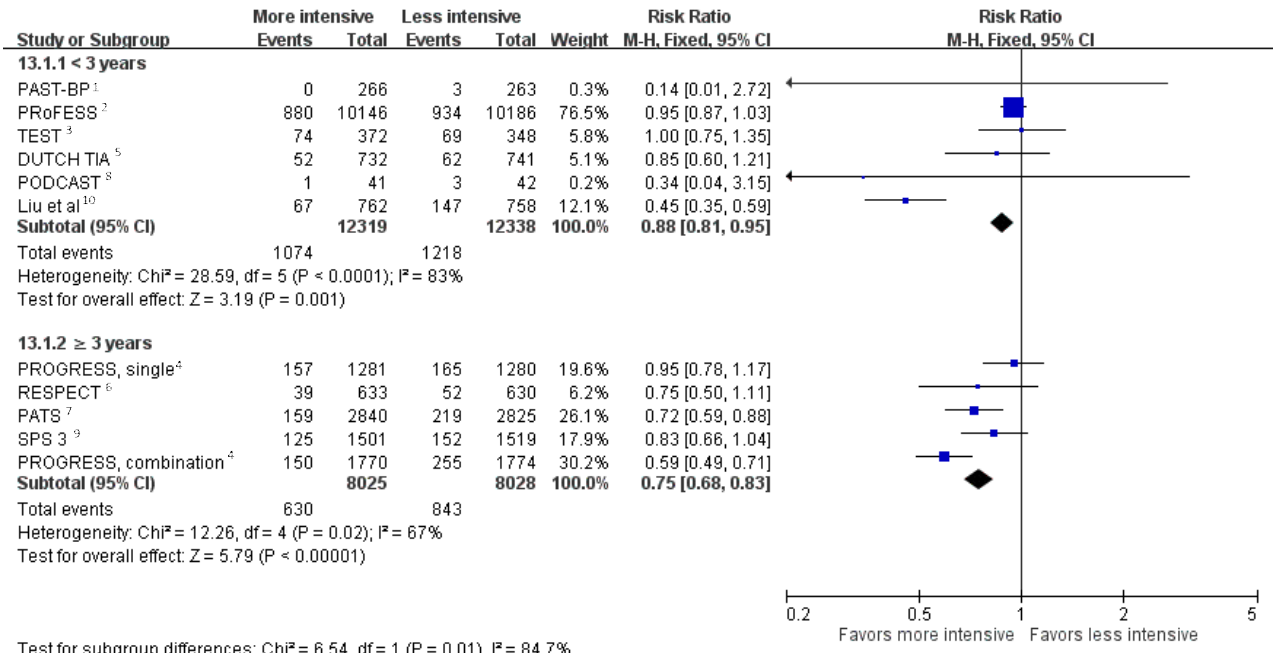

## eFigure 14. Ethnicity

Legends: Relative risk with 95% confidence interval of recurrent stroke in more intensive vs less intensive blood pressure lowering in patients with stroke or transient ischemic attack in Asians vs mostly non-Asians.

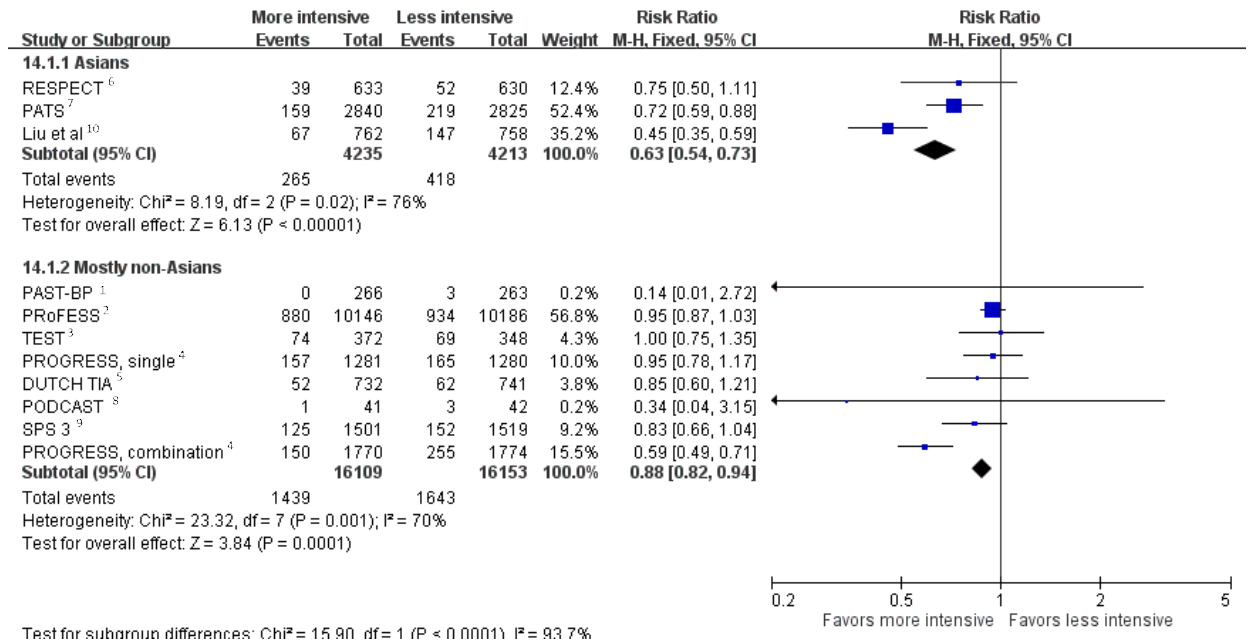

## eFigure 15. Antihypertensive drugs used in more intensive treated group

Legends: Relative risk with 95% confidence interval of recurrent stroke in more intensive vs less intensive blood pressure lowering in patients with stroke or transient ischemic attack for antihypertensive drugs used in the more intensive treated arm (angiotensin-converting enzyme [ACE] inhibitors vs angiotensin receptor blockers vs beta blockers vs diuretics vs ACE inhibitors plus diuretics).

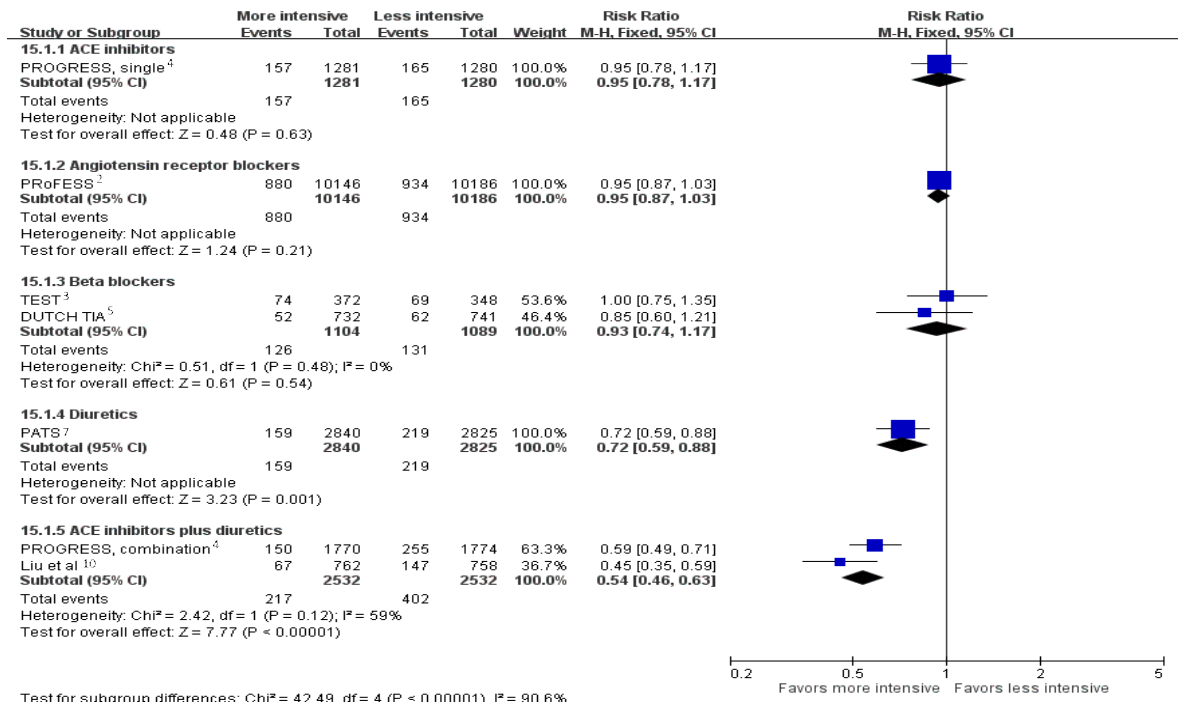

## eFigure 16. Mean baseline SBP

Legends: Relative risk with 95% confidence interval of recurrent stroke in more intensive vs less intensive blood pressure lowering in patients with stroke or transient ischemic attack with mean baseline SBP levels  $\geq 150$  mmHg vs 140-149 mmHg.

SBP: systolic blood pressure

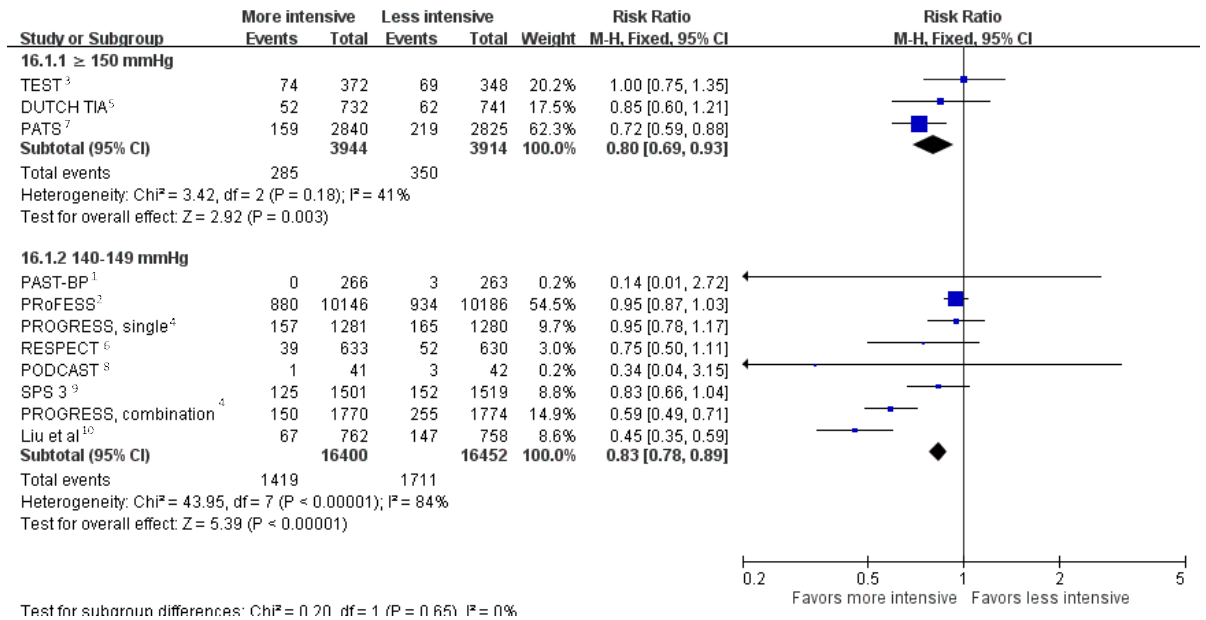

## eFigure 17. Achieved SBP in more intensive treated group

Legends: Relative risk with 95% confidence interval of recurrent stroke in more intensive vs less intensive blood pressure lowering in patients with stroke or transient ischemic attack with achieved SBP levels in the more intensive blood pressure lowering group ( $\geq 140$  mmHg vs 130 to  $< 140$  mmHg vs  $< 130$  mmHg).

SBP: systolic blood pressure

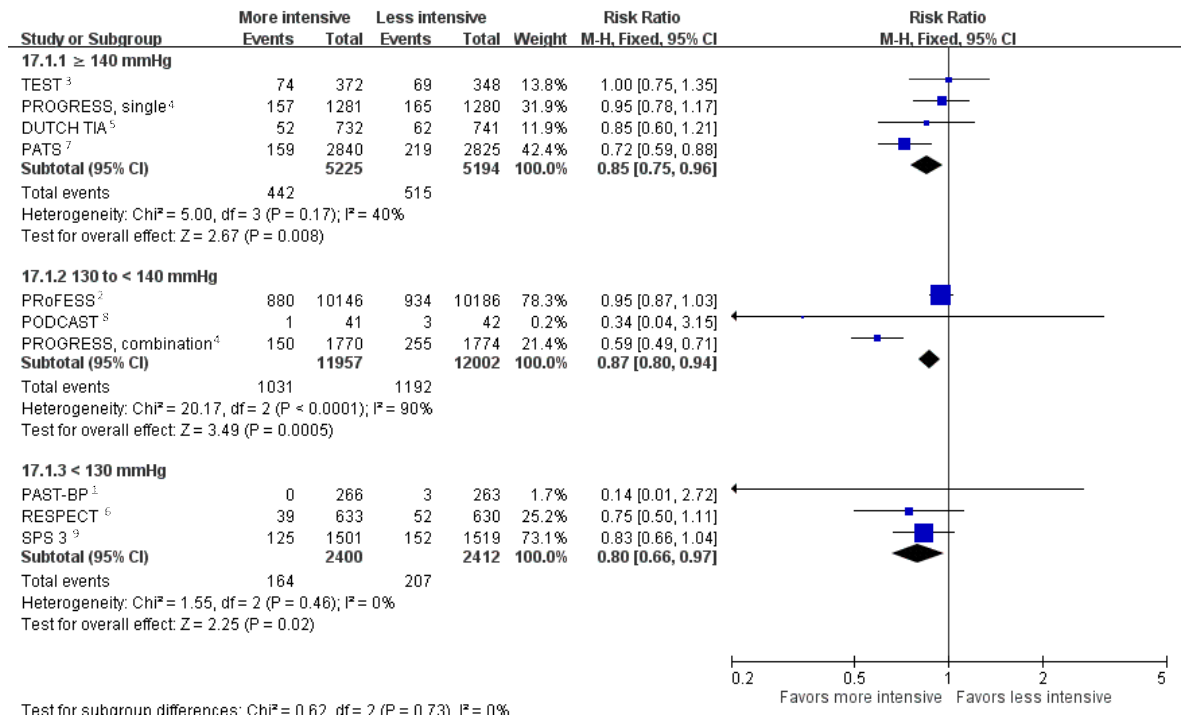

## eFigure 18. Achieved SBP in less intensive treated group

Legends: Relative risk with 95% confidence interval of recurrent stroke in more intensive vs less intensive blood pressure lowering in patients with stroke or transient ischemic attack with achieved SBP levels in the less intensive blood pressure lowering group ( $\geq 140$  mmHg vs 130 to  $< 140$  mmHg vs  $< 130$  mmHg).

SBP: systolic blood pressure

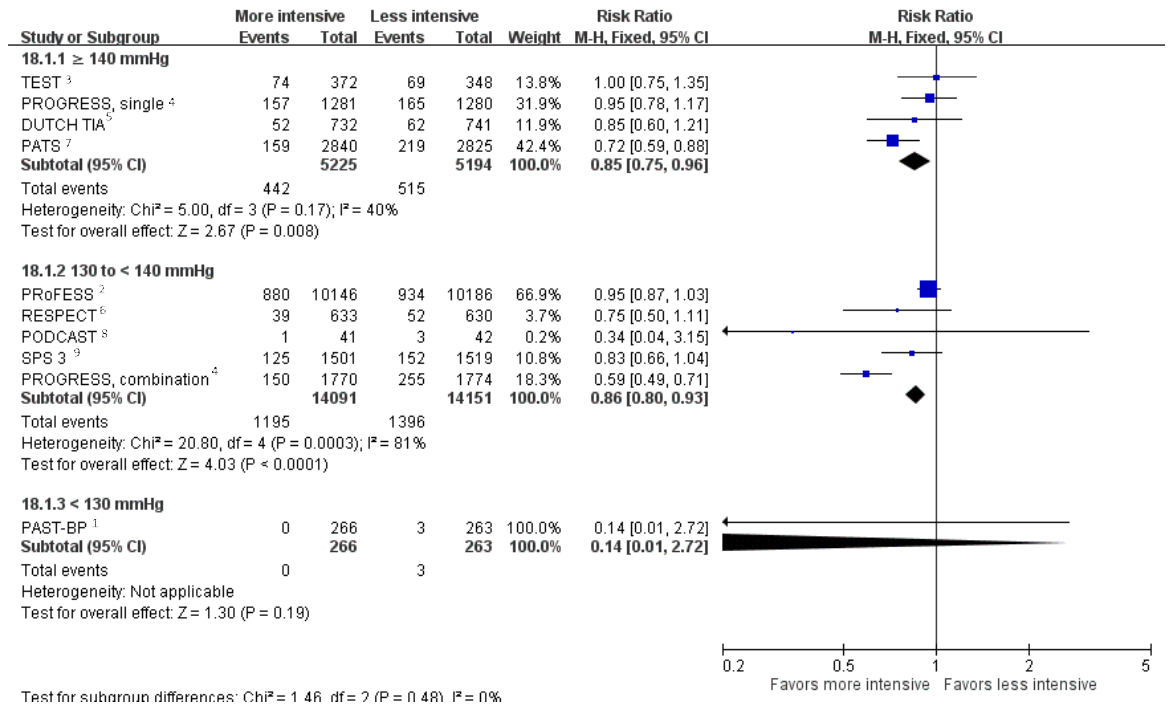

## eFigure 19. Entry event

Legends: Relative risk with 95% confidence interval of recurrent stroke in more intensive vs less intensive blood pressure lowering in patients with stroke or transient ischemic attack with ischemic stroke vs hemorrhagic stroke as an entry event

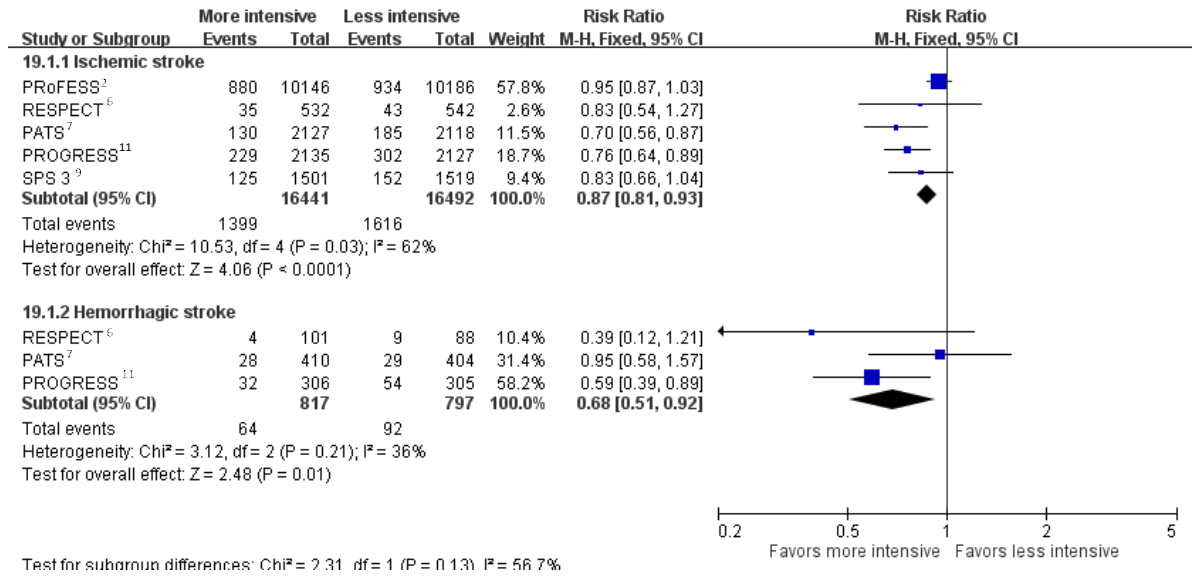

## eFigure 20. Sample size

Legends: Relative risk with 95% confidence interval of recurrent stroke in more intensive vs less intensive blood pressure lowering in patients with stroke or transient ischemic attack with sample size < 3000 vs ≥ 3000 patients.

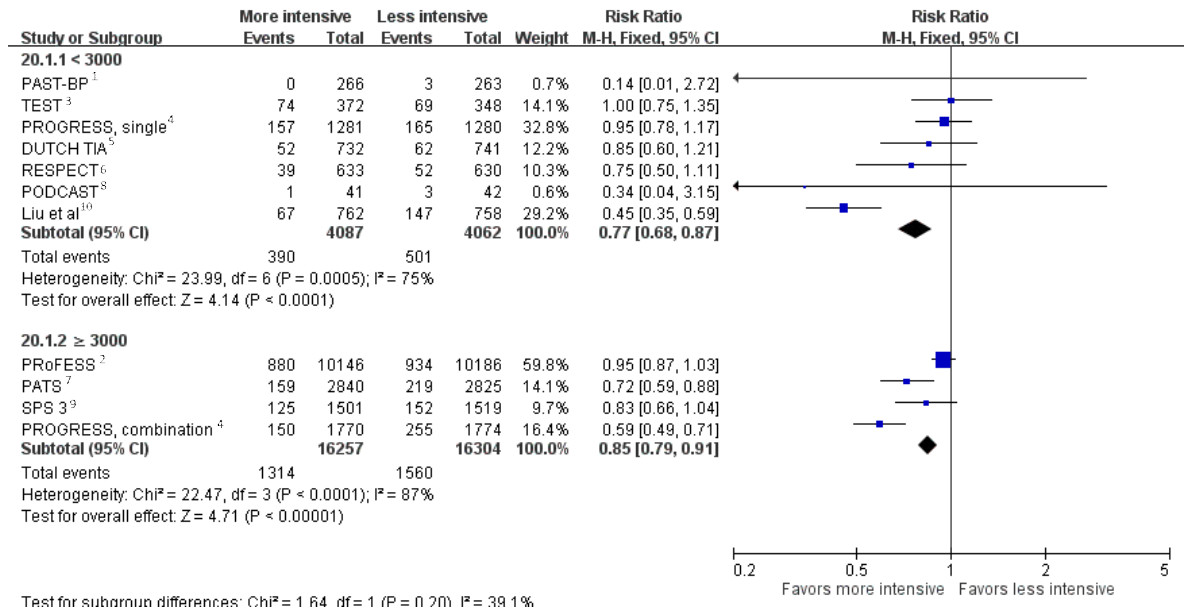



## eFigure 21. Study design

Legends: Relative risk with 95% confidence interval of recurrent stroke in more intensive vs less intensive blood pressure lowering in patients with stroke or transient ischemic attack, antihypertensive drugs vs placebo and a lower blood pressure target vs a higher blood pressure target.

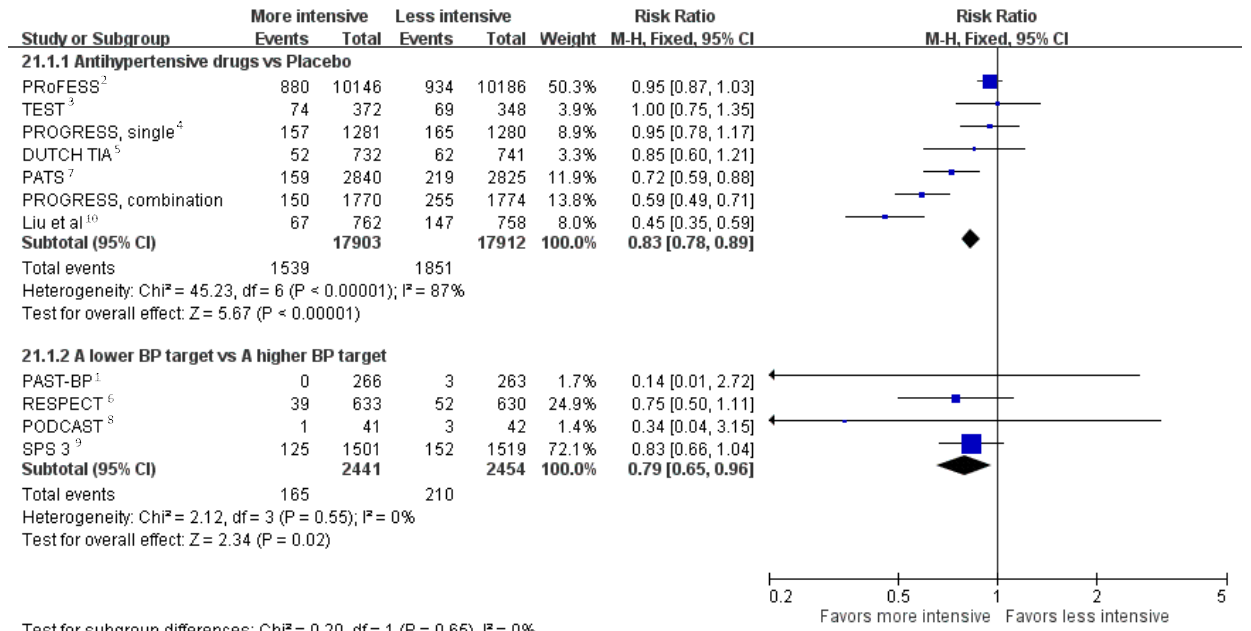

## eFigure 22. Definition of differential blood pressure reduction

Legends: Relative risk with 95% confidence interval of recurrent stroke in more intensive vs less intensive blood pressure lowering in patients with stroke or transient ischemic attack with, average difference throughout the studies vs other definitions.

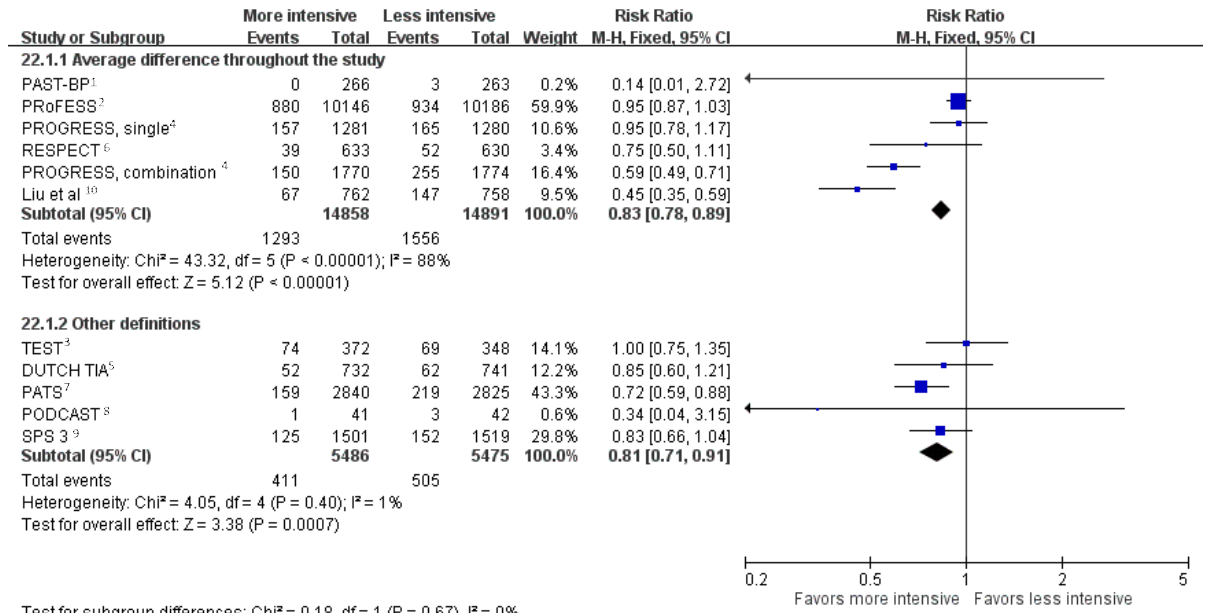

### eFigure 23. Publication bias

Legends: Trim-and-fill analysis for included trials to explore potential publication bias

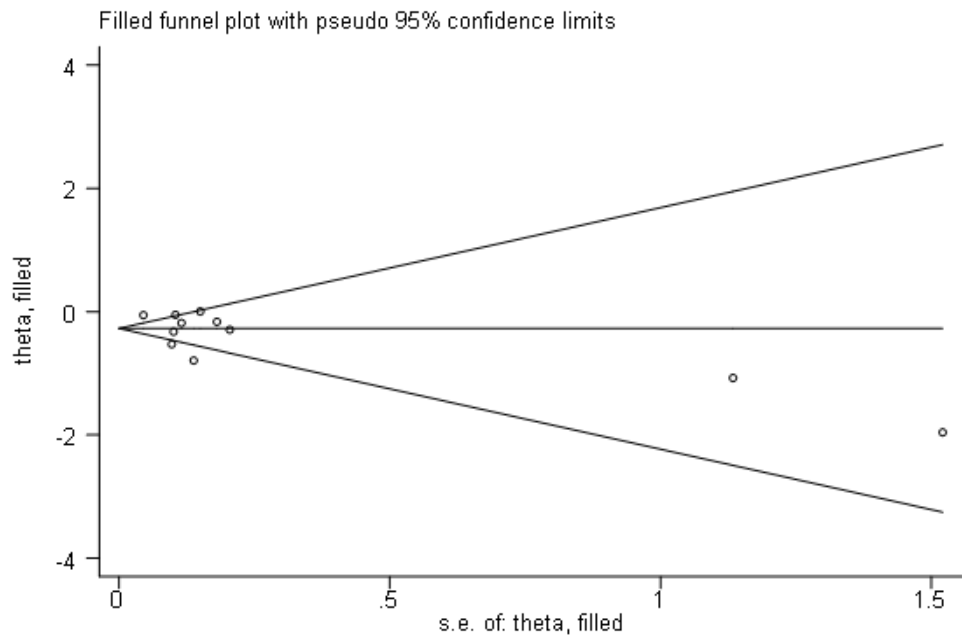

## eReferences

1. Mant J, McManus RJ, Roalfe A, et al. Different systolic blood pressure targets for people with history of stroke or transient ischaemic attack: PAST-BP (Prevention After Stroke--Blood Pressure) randomised controlled trial. *BMJ*. 2016;352:i708.
2. Yusuf S, Diener HC, Sacco RL, et al. Telmisartan to prevent recurrent stroke and cardiovascular events. *N Engl J Med*. 2008;359(12):1225-1237.
3. Eriksson S, Olofsson B, Wesley P, the TEST study group. Atenolol in Secondary Prevention after Stroke. *Cerebrovascular Diseases*. 1995;5:21-25.
4. PROGRESS Collaborative Group. Randomised trial of a perindopril-based blood-pressure-lowering regimen among 6105 individuals with previous stroke or transient ischaemic attack. *The Lancet*. 2001;358(9287):1033-1041.
5. The Dutch TIA Trial Study Group. Trial of secondary prevention with atenolol after transient ischemic attack or nondisabling ischemic stroke. *Stroke*. 1993;24(4):543-548.
6. Kitagawa K, Yamamoto Y, Arima H, et al. Effect of Standard vs Intensive Blood Pressure Control on the Risk of Recurrent Stroke: A Randomized Clinical Trial and Meta-analysis. *JAMA Neurol*. 2019;76(11):1309-1318.
7. Liu L, Wang Z, Gong L, et al. Blood pressure reduction for the secondary prevention of stroke: a Chinese trial and a systematic review of the literature. *Hypertens Res*. 2009;32(11):1032-1040.
8. Bath PM, Scutt P, Blackburn DJ, et al. Intensive versus Guideline Blood Pressure and Lipid Lowering in Patients with Previous Stroke: Main Results from the Pilot "Prevention of Decline in Cognition after Stroke Trial" (PODCAST) Randomised Controlled Trial. *PLoS One*. 2017;12(1):e0164608.
9. The SPS3 Study Group. Blood-pressure targets in patients with recent lacunar stroke: the SPS3 randomised trial. *The Lancet*. 2013;382(9891):507-515.
10. Liu LS, Gong LS, Wang W, Blood Pressure Lowering to Prevent Recurrent Stroke Study G. Effects of blood pressure lowering treatment on stroke recurrence in patients with cerebrovascular diseases- a large-scale, randomized, placebo controlled trial. *Zhonghua Xin Xue Guan Bing Za Zhi*. 2005;33(7):613-617.
11. Chapman N, Huxley R, Anderson C, et al. Effects of a perindopril-based blood pressure-lowering regimen on the risk of recurrent stroke according

to stroke subtype and medical history: the PROGRESS Trial. *Stroke*. 2004;35(1):116-121.
