# Supplementary material for: Association Between Magnitude of Differential Blood Pressure Reduction and Secondary Stroke Prevention: A Meta-analysis and Meta-Regression
Source: PubMed Central journal article supplement (PMC10028545; doi:10.1001/jamaneurol.2023.0218), 2023-03-20
Supplement: jamaneurol-e230218-s002.pdf [file jamaneurol-e230218-s002.pdf]

## Data Sharing Statement

Hsu. Association Between Magnitude of Differential Blood Pressure Reduction and Secondary Stroke Prevention. *JAMA Neurol*. Published March 20, 2023.

doi:10.1001/jamaneurol.2023.0218

### Data

**Data available:** No
